# Supplementary material
Source: Springer Nature journal article supplement (https://www.springermedizin.de/resource/supplementary/13005_2008_145_MOESM8_ESM.pdf/9626356)

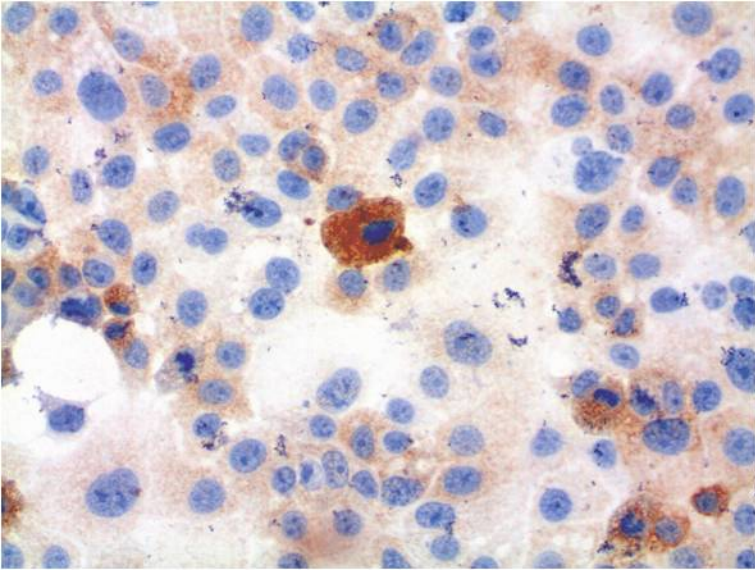

Supplement: MOESM8 [file 9626356]
